# Supplementary material
Source: publisher site journal article supplement (https://www.dovepress.com/get_supplementary_file.php?f=452618.docx)
Supplement: Supplementary file 1 [file get_supplementary_file.php]

Supplementary Table 1: All included acupoint prescriptions

| **No** | **Acupoint** |
| --- | --- |
| 1 | DaLing |
| 1 | NeiGuan |
| 1 | HeGu |
| 2 | DaLing |
| 2 | ErBai |
| 2 | NeiGuan |
| 2 | HeGu |
| 2 | WaiLaoGong |
| 3 | QuChi |
| 3 | WaiGuan |
| 3 | DaLing |
| 3 | YangChi |
| 3 | BaXie |
| 4 | YangChi |
| 4 | DaLing |
| 4 | YangXi |
| 4 | WanGu |
| 5 | DaLing |
| 5 | HeGu |
| 5 | NeiGuan |
| 5 | ShouSanLi |
| 6 | ShouSanLi |
| 6 | NeiGuan |
| 6 | DaLing |
| 6 | HeGu |
| 7 | DaLing |
| 7 | JingQu |
| 7 | KongZui |
| 8 | DaLing |
| 8 | YangXi |
| 8 | HeGu |
| 9 | DaLing |
| 9 | WaiGuan |
| 9 | ErBai |
| 10 | DaLing |
| 10 | ZhongZhu |
| 10 | YeMen |
| 11 | DaLing |
| 11 | ShenMen |
| 11 | SanYinJiao |
| 12 | DaLing |
| 12 | YuJi |
| 13 | DaLing |
| 13 | NeiGuan |
| 13 | BaXie |
| 14 | DaLing |
| 14 | ShenMen |
| 15 | YangChi |
| 15 | YangXi |
| 15 | YangGu |
| 15 | WaiGuan |
| 16 | TianJing |
| 16 | ShaoHai |
| 16 | QuChi |
| 16 | ShouSanLi |
| 16 | WaiGuan |
| 16 | YangChi |
| 16 | YangXi |
| 16 | YangGuan |
| 16 | aShiXue |
| 17 | HeGu |
| 17 | NeiGuan |
| 18 | DaLing |
| 18 | NeiGuan |
| 19 | ShouSanLi |
| 19 | DaLing |
| 19 | LaoGong |
| 19 | NeiGuan |
| 19 | YangXi |
| 19 | HeGu |
| 20 | WanGu |
| 20 | YangGu |
| 20 | ZhiZheng |
| 20 | XiaoHai |
| 20 | ShenMen |
| 21 | NeiGuan |
| 21 | DaLing |
| 21 | HeGu |
| 21 | YangXi |
| 21 | LieQue |
| 22 | DaLing |
| 22 | NeiGuan |
| 23 | ShouSanLi |
| 23 | QuChi |
| 23 | WaiGuan |
| 23 | NeiGuan |
| 23 | HeGu |
| 23 | LaoGong |
| 23 | DaLing |
| 23 | ZhongZhu |
| 24 | DaLing |
| 24 | ShenMen |
| 24 | NeiGuan |
| 24 | aShiXue |
| 25 | DaLing |
| 25 | WaiGuan |
| 25 | YangXi |
| 25 | NeiGuan |
| 25 | HeGu |
| 25 | LaoGong |
| 26 | DaLing |
| 27 | YangChi |
| 27 | YangXi |
| 27 | YangGu |
| 27 | WaiGuan |
| 28 | QuChi |
| 28 | ChiZe |
| 28 | ShouSanLi |
| 28 | aShiXue |
| 28 | ZhouLiao |
| 29 | QuChi |
| 29 | ChiZe |
| 29 | ShouSanLi |
| 29 | aShiXue |
| 29 | HeGu |
| 30 | QuChi |
| 30 | ChiZe |
| 30 | ShouSanLi |
| 30 | aShiXue |
| 30 | ShenYu |
| 30 | SanYinJiao |
| 31 | NeiGuan |
| 31 | DaLing |
| 32 | NeiGuan |
| 32 | WaiGuan |
| 33 | BiZhong |
| 33 | JianShi |
| 33 | DaLing |
| 33 | aShiXue |
| 34 | LaoGong |
| 34 | YuJi |
| 34 | DaLing |
| 34 | NeiGuan |
| 34 | QuZe |
| 34 | HeGu |
| 34 | WaiGuan |
| 34 | YangGu |
| 34 | YangChi |
| 34 | YangXi |
| 34 | QuChi |
| 35 | DaLing |
| 35 | NeiGuan |
| 35 | HeGu |
| 35 | YangXi |
| 35 | QuChi |
| 35 | ShouSanLi |
| 35 | YuJi |
| 35 | aShiXue |
| 36 | DaLing |
| 36 | NeiGuan |
| 36 | YangXi |
| 36 | PianLi |
| 36 | YangChi |
| 36 | WaiGuan |
| 36 | WanGu |
| 36 | YangLao |
| 37 | XiMen |
| 37 | QuZe |
| 37 | KongZui |
| 37 | ChiZe |
| 37 | QuChi |
| 37 | ShouSanLi |
| 37 | SiDu |
| 37 | TianJing |
| 37 | ZhiZheng |
| 37 | XiaoHai |
| 38 | QuChi |
| 38 | HeGu |
| 38 | WaiGuan |
| 38 | DaLing |
| 39 | YangGu |
| 39 | YangChi |
| 39 | LieQue |
| 39 | NeiGuan |
| 39 | JianShi |
| 40 | DaLing |
| 40 | NeiGuan |
| 41 | DaLing |
| 41 | NeiGuan |
| 41 | JingQu |
| 41 | KongZui |
| 42 | DaLing |
| 42 | NeiGuan |
| 42 | YangXi |
| 42 | HeGu |
| 43 | DaLing |
| 43 | NeiGuan |
| 43 | ErJian |
| 43 | WaiGuan |
| 44 | DaLing |
| 44 | NeiGuan |
| 44 | ZhongZhu |
| 44 | YeMen |
| 45 | DaLing |
| 45 | NeiGuan |
| 45 | ShenMen |
| 45 | SanYinJiao |
| 46 | DaLing |
| 46 | NeiGuan |
| 46 | YuJi |
| 47 | DaLing |
| 47 | NeiGuan |
| 47 | WaiGuan |
| 47 | YuJi |
| 47 | YangXi |
| 48 | JingJiaJi |
| 48 | QuChi |
| 48 | NeiGuan |
| 48 | DaLing |
| 48 | HeGu |
| 48 | BaFeng |
| 49 | DaLing |
| 49 | NeiGuan |
| 49 | JingQu |
| 49 | KongZui |
| 50 | DaLing |
| 50 | NeiGuan |
| 50 | YangXi |
| 50 | HeGu |
| 51 | DaLing |
| 51 | NeiGuan |
| 51 | WaiGuan |
| 51 | ErBai |
| 52 | ShiXuan |
| 52 | DaLing |
| 52 | LaoGong |
| 52 | NeiGuan |
| 53 | NeiGuan |
| 53 | DaLing |
| 54 | QuChi |
| 54 | YangChi |
| 54 | ShouSanLi |
| 54 | NeiGuan |
| 54 | HeGu |
| 54 | ShenMen |
| 54 | YangXi |
| 55 | NeiGuan |
| 55 | DaLing |
| 55 | aShiXue |
| 56 | aShiXue |
| 57 | NeiGuan |
| 57 | DaLing |
| 57 | YuJi |
| 58 | NeiGuan |
| 58 | DaLing |
| 58 | YuJi |
| 58 | LaoGong |
| 59 | QuChi |
| 59 | WaiGuan |
| 59 | HeGu |
| 59 | DaLing |
| 59 | NeiGuan |
| 59 | YangXi |
| 59 | BaXie |
| 60 | NeiGuan |
| 60 | DaLing |
| 61 | DaLing |
| 61 | NeiGuan |
| 61 | JingQu |
| 61 | ShaoShang |
| 62 | DaLing |
| 62 | NeiGuan |
| 62 | YangXi |
| 62 | HeGu |
| 63 | DaLing |
| 63 | NeiGuan |
| 63 | WaiGuan |
| 64 | DaLing |
| 64 | NeiGuan |
| 64 | ZhongZhu |
| 64 | YeMen |
| 64 | WaiLaoGong |
| 65 | DaLing |
| 65 | NeiGuan |
| 65 | YuJi |
| 66 | YangXi |
| 66 | WaiGuan |
| 66 | HeGu |
| 66 | LaoGong |
| 67 | NeiGuan |
| 67 | WaiGuan |
| 67 | HeGu |
| 67 | YangXi |
| 67 | YangChi |
| 67 | YangGu |
| 67 | DaLing |
| 67 | TaiYuan |
| 67 | ShenMen |
| 68 | YangXi |
| 68 | WaiGuan |
| 68 | HeGu |
| 68 | LaoGong |
| 69 | BiZhong |
| 69 | JianShi |
| 69 | DaLing |
| 69 | aShiXue |
| 70 | BiZhong |
| 70 | JianShi |
| 70 | DaLing |
| 70 | aShiXue |
| 71 | QuChi |
| 71 | ChiZe |
| 71 | ShaoHai |
| 71 | DaLing |
| 71 | YangGu |
| 71 | YangXi |
| 71 | YangChi |
| 71 | WaiGuan |
| 71 | NeiGuan |
| 71 | WaiLaoGong |
| 71 | LaoGong |
| 71 | LieQue |
| 71 | JianShi |
| 71 | ShenMen |
| 71 | aShiXue |
| 72 | QuChi |
| 72 | ChiZe |
| 72 | ShaoHai |
| 72 | DaLing |
| 72 | YangGu |
| 72 | YangXi |
| 72 | YangChi |
| 72 | WaiGuan |
| 72 | NeiGuan |
| 72 | WaiLaoGong |
| 72 | LaoGong |
| 72 | SiFeng |
| 72 | BaXie |
| 73 | QuChi |
| 73 | ChiZe |
| 73 | ShaoHai |
| 73 | DaLing |
| 73 | YangGu |
| 73 | YangXi |
| 73 | YangChi |
| 73 | WaiGuan |
| 73 | NeiGuan |
| 73 | WaiLaoGong |
| 73 | LaoGong |
| 73 | YuJi |
| 73 | HeGu |
| 73 | HouXi |
| 74 | DaLing |
| 74 | NeiGuan |
| 74 | JianShi |
| 74 | HeGu |
| 74 | LaoGong |
| 75 | DaLing |
| 75 | ShenMen |
| 75 | JianShi |
| 75 | YangChi |
| 75 | WaiGuan |
| 76 | QuChi |
| 76 | HeGu |
| 76 | WaiGuan |
| 76 | ZhongZhu |
| 76 | DaLing |
| 77 | QuZe |
| 77 | XiMen |
| 77 | JianShi |
| 77 | YuJi |
| 78 | DaLing |
| 78 | JingQu |
| 78 | NeiGuan |
| 78 | WaiGuan |
| 78 | QuChi |
| 78 | HeGu |
| 79 | DaLing |
| 79 | JingQu |
| 79 | NeiGuan |
| 79 | WaiGuan |
| 79 | ZhongZhu |
| 79 | YeMen |
| 80 | DaLing |
| 80 | JingQu |
| 80 | NeiGuan |
| 80 | WaiGuan |
| 80 | ShenMen |
| 80 | SanYinJiao |
| 81 | DaLing |
| 81 | JingQu |
| 81 | NeiGuan |
| 81 | WaiGuan |
| 81 | YuJi |
| 82 | NeiGuan |
| 82 | DaLing |
| 82 | LaoGong |
| 82 | YuJi |
| 83 | NeiGuan |
| 83 | DaLing |
| 83 | HeGu |
| 83 | YangXi |
| 83 | LieQue |
| 84 | WaiGuan |
| 84 | HeGu |
| 84 | QuChi |
| 84 | YangChi |
| 84 | YangXi |
| 84 | YangGu |
| 85 | KongZui |
| 85 | LieQue |
| 85 | PianLi |
| 85 | HeGu |
| 85 | YangXi |
| 85 | JingQu |
| 85 | TaiYuan |
| 85 | YuJi |
| 85 | TongLi |
| 85 | WenLiu |
| 85 | ShangLian |
| 85 | XiaLian |
| 85 | ShouSanLi |
| 85 | ZhongZhu |
| 85 | YangChi |
| 85 | YangGu |
| 85 | WanGu |
| 85 | YeMen |
| 85 | WaiGuan |
| 85 | YangLao |
| 85 | NeiGuan |
| 85 | ShenMen |
| 85 | HouXi |
| 85 | LaoGong |
| 86 | DaLing |
| 86 | NeiGuan |
| 86 | YangChi |
| 86 | WaiGuan |
| 86 | WaiLaoGong |
| 86 | LaoGong |
| 86 | JianShi |
| 86 | ShenMen |
| 86 | YangXi |
| 86 | YangGu |
| 86 | aShiXue |
| 87 | DaLing |
| 87 | NeiGuan |
| 87 | YangChi |
| 87 | WaiGuan |
| 87 | WaiLaoGong |
| 87 | LaoGong |
| 87 | HeGu |
| 87 | BaXie |
| 88 | DaLing |
| 88 | NeiGuan |
| 88 | YangChi |
| 88 | WaiGuan |
| 88 | WaiLaoGong |
| 88 | LaoGong |
| 88 | YuJi |
| 89 | NeiGuan |
| 89 | DaLing |
| 89 | YuJi |
| 89 | LaoGong |
| 89 | aShiXue |
| 90 | NeiGuan |
| 90 | YangXi |
| 90 | YuJi |
| 90 | HeGu |
| 90 | LaoGong |
| 90 | aShiXue |
| 91 | HuaRouMen |
| 91 | ShangFengShiDian |
| 91 | DaLing |
| 92 | DaLing |
| 92 | NeiGuan |
| 92 | HeGu |
| 92 | WaiGuan |
| 92 | YangChi |
| 93 | DaLing |
| 93 | NeiGuan |
| 93 | YangXi |
| 93 | aShiXue |
| 94 | DaLing |
| 95 | WaiGuan |
| 95 | HeGu |
| 96 | ZhongZhu |
| 96 | YangChi |
| 96 | ZhiGou |
| 96 | TianJing |
| 96 | HouXi |
| 96 | WanGu |
| 96 | XiaoHai |
| 96 | ShenMen |
| 96 | ShaoHai |
| 96 | ShouSanLi |
| 96 | HeGu |
| 96 | YangXi |
| 96 | QuChi |
| 97 | DaLing |
| 97 | NeiGuan |
| 97 | JianShi |
| 97 | YuJi |
| 97 | HeGu |
| 97 | QuZe |
| 98 | DaLing |
| 98 | LaoGong |
| 98 | HeGu |
| 98 | YuJi |
| 98 | NeiGuan |
| 98 | JianShi |
| 98 | QuZe |
| 99 | TaoDao |
| 99 | ShenZhu |
| 99 | ShenDao |
| 99 | Feishu |
| 99 | XinShu |
| 99 | YangChi |
| 99 | WaiGuan |
| 99 | YangXi |
| 99 | WanGu |
| 100 | ShiXuan |
| 100 | DaLing |
| 100 | LaoGong |
| 101 | DaLing |
| 102 | WaiGuan |
| 102 | HeGu |
| 102 | YangXi |
| 102 | aShiXue |
| 103 | ErBai |
| 104 | WaiGuan |
| 104 | LaoGong |
| 104 | DaLing |
| 104 | ZhongZhu |
| 105 | DaLing |
| 105 | HeGu |
| 105 | ErBai |
| 106 | TianJing |
| 106 | ShaoHai |
| 106 | QuChi |
| 106 | ShouSanLi |
| 106 | WaiGuan |
| 106 | YangChi |
| 106 | YangXi |
| 106 | aShiXue |
| 107 | DaLing |
| 107 | ShenMen |
| 108 | YangGu |
| 108 | YangChi |
| 108 | LieQue |
| 108 | NeiGuan |
| 109 | ShouSanLi |
| 109 | WaiGuan |
| 109 | YangXi |
| 109 | HeGu |
| 109 | DaLing |
| 109 | YuJi |
| 110 | ShuiQu |
| 110 | YangXi |
| 110 | WaiGuan |
| 110 | HeGu |
| 110 | LaoGong |
| 111 | DaLing |
| 111 | NeiGuan |
| 111 | YangChi |
| 111 | WaiGuan |
| 111 | WaiLaoGong |
| 111 | LaoGong |
| 111 | JianShi |
| 111 | ShenMen |
| 111 | aShiXue |
| 112 | DaLing |
| 112 | NeiGuan |
| 112 | YangChi |
| 112 | WaiGuan |
| 112 | WaiLaoGong |
| 112 | LaoGong |
| 112 | SiFeng |
| 112 | BaXie |
| 113 | DaLing |
| 113 | NeiGuan |
| 113 | YangChi |
| 113 | WaiGuan |
| 113 | WaiLaoGong |
| 113 | LaoGong |
| 113 | YuJi |
| 113 | HeGu |
| 113 | HouXi |
| 114 | DaLing |
| 114 | YangChi |
| 114 | YangGu |
| 114 | JingQu |
| 114 | WaiGuan |
| 114 | NeiGuan |
| 114 | QuChi |
| 114 | HeGu |
| 115 | DaLing |
| 115 | YangChi |
| 115 | YangGu |
| 115 | JingQu |
| 115 | WaiGuan |
| 115 | NeiGuan |
| 115 | ZhongZhu |
| 115 | YeMen |
| 116 | DaLing |
| 116 | YangChi |
| 116 | YangGu |
| 116 | JingQu |
| 116 | WaiGuan |
| 116 | NeiGuan |
| 116 | ShenMen |
| 116 | SanYinJiao |
| 117 | DaLing |
| 117 | YangChi |
| 117 | YangGu |
| 117 | JingQu |
| 117 | WaiGuan |
| 117 | NeiGuan |
| 117 | YuJi |
| 118 | DaLing |
| 118 | NeiGuan |
| 118 | YangXi |
| 119 | YangChi |
| 119 | YangGu |
| 119 | YangXi |
| 119 | HeGu |
| 119 | QuChi |
| 119 | WaiGuan |
| 119 | aShiXue |
| 119 | SiFeng |
| 119 | ShiXuan |
| 120 | YangChi |
| 120 | YangGu |
| 120 | YangXi |
| 120 | HeGu |
| 120 | QuChi |
| 120 | WaiGuan |
| 120 | aShiXue |
| 120 | YuJi |
| 120 | LaoGong |
| 120 | HouXi |
| 121 | YangChi |
| 121 | YangGu |
| 121 | YangXi |
| 121 | HeGu |
| 121 | QuChi |
| 121 | WaiGuan |
| 121 | aShiXue |
| 121 | DaLing |
| 121 | YangLao |
| 121 | LieQue |
| 122 | YangChi |
| 122 | YangGu |
| 122 | YangXi |
| 122 | HeGu |
| 122 | QuChi |
| 122 | WaiGuan |
| 122 | aShiXue |
| 122 | ShouSanLi |
| 122 | QuZe |
| 123 | DaLing |
| 123 | WuHu |
| 123 | LaoGong |
| 123 | HeGu |
| 123 | NeiGuan |
| 123 | QuChi |
| 124 | BaXie |
| 125 | DaLing |
| 125 | NeiGuan |
| 125 | HeGu |
| 125 | YangXi |
| 126 | DaLing |
| 126 | NeiGuan |
| 126 | KongZui |
| 126 | JingQu |
| 127 | DaLing |
| 127 | NeiGuan |
| 127 | YangXi |
| 128 | DaLing |
| 128 | NeiGuan |
| 128 | YangXi |
| 129 | DaLing |
| 129 | NeiGuan |
| 129 | JingQu |
| 129 | KongZui |
| 130 | DaLing |
| 130 | NeiGuan |
| 130 | YangXi |
| 130 | HeGu |
| 131 | DaLing |
| 131 | NeiGuan |
| 131 | WaiGuan |
| 131 | ErBai |
| 132 | DaLing |
| 132 | JianShi |
| 133 | YangXi |
| 133 | HeGu |
| 133 | DaLing |
| 133 | YuJi |
| 133 | NeiGuan |
| 133 | JingQu |
| 134 | TaiYuan |
| 134 | DaLing |
| 134 | NeiGuan |
| 134 | KongZui |
| 134 | JingQu |
| 135 | TaiYuan |
| 135 | DaLing |
| 135 | NeiGuan |
| 135 | HeGu |
| 135 | SanJian |
| 135 | YangXi |
| 136 | TaiYuan |
| 136 | DaLing |
| 136 | NeiGuan |
| 136 | ErBai |
| 137 | YangXi |
| 137 | PianLi |
| 137 | DaLing |
| 137 | QuZe |
| 137 | HeGu |
| 137 | YuJi |
| 137 | ZuSanLi |
| 137 | ShouSanLi |
| 137 | WaiLaoGong |
| 137 | LaoGong |
| 137 | NeiGuan |
| 137 | WaiGuan |
| 138 | aShiXue |
| 138 | DaLing |
| 138 | ShenMen |
| 138 | TaiYuan |
| 138 | LaoGong |
| 138 | NeiGuan |
| 138 | JianShi |
| 138 | QuZe |
| 139 | NeiGuan |
| 139 | JingQu |
| 139 | KongZui |
| 140 | NeiGuan |
| 140 | YangXi |
| 140 | HeGu |
| 141 | NeiGuan |
| 141 | ErBai |
| 142 | DaLing |
| 142 | XiMen |
| 142 | NeiGuan |
| 142 | LaoGong |
| 142 | QingLing |
| 142 | ShenMen |
| 142 | ShaoFu |
| 142 | TaiYuan |
| 142 | QuChi |
| 143 | DaLing |
| 143 | NeiGuan |
| 143 | aShiXue |
| 144 | DaLing |
| 144 | HeGu |
| 144 | NeiGuan |
| 144 | ShouSanLi |
| 145 | YangChi |
| 145 | NeiGuan |
| 145 | HeGu |
| 146 | YangChi |
| 146 | YangLao |
| 146 | WaiGuan |
| 146 | YangXi |
| 146 | YangGu |
| 146 | SanYangLuo |
| 146 | PianLi |
| 146 | TaiYuan |
| 146 | DaLing |
| 146 | ShenMen |
| 147 | QuChi |
| 147 | ChiZe |
| 147 | ShouSanLi |
| 147 | YangXi |
| 147 | WaiGuan |
| 147 | LaoGong |
| 147 | aShiXue |
| 148 | DaLing |
| 148 | QuChi |
| 148 | NeiGuan |
| 148 | HeGu |
| 148 | ShouSanLi |
| 149 | QuChi |
| 149 | NeiGuan |
| 149 | DaLing |
| 149 | HeGu |
| 149 | ShouSanLi |
| 149 | ShouWuLi |
| 150 | YangXi |
| 150 | DaLing |
| 150 | HeGu |
| 150 | NeiGuan |
| 151 | DaLing |
| 151 | NeiGuan |
| 151 | JianShi |
| 151 | WaiGuan |
| 151 | YangXi |
| 151 | YangChi |
| 151 | YangGu |
| 151 | LieQue |
| 151 | YuJi |
| 151 | LaoGong |
| 151 | HeGu |
| 152 | DaLing |
| 152 | NeiGuan |
| 153 | ChiZe |
| 153 | aShiXue |
| 153 | QuChi |
| 153 | ShouSanLi |
| 154 | ChiZe |
| 154 | aShiXue |
| 154 | QuChi |
| 154 | ShouSanLi |
| 154 | ZhouLiao |
| 155 | ChiZe |
| 155 | aShiXue |
| 155 | QuChi |
| 155 | ShouSanLi |
| 155 | ShenShu |
| 155 | SanYinJiao |
| 156 | ChiZe |
| 156 | aShiXue |
| 156 | QuChi |
| 156 | ShouSanLi |
| 156 | HeGu |
| 157 | ChiZe |
| 157 | aShiXue |
| 157 | QuChi |
| 157 | ShouSanLi |
| 157 | LaoGong |
| 158 | ChiZe |
| 158 | aShiXue |
| 158 | QuChi |
| 158 | ShouSanLi |
| 158 | ZhouLiao |
| 158 | LaoGong |
| 159 | ChiZe |
| 159 | aShiXue |
| 159 | QuChi |
| 159 | ShouSanLi |
| 159 | ShenShu |
| 159 | SanYinJiao |
| 159 | LaoGong |
| 160 | ChiZe |
| 160 | aShiXue |
| 160 | QuChi |
| 160 | ShouSanLi |
| 160 | HeGu |
| 160 | LaoGong |
| 161 | DaLing |
| 161 | NeiGuan |
| 161 | HeGu |
| 161 | YangXi |
| 161 | QuChi |
| 161 | ShouSanLi |
| 161 | YuJi |
| 161 | LaoGong |
| 161 | aShiXue |
| 162 | DaLing |
| 162 | ShenMen |
| 162 | NeiGuan |
| 162 | WaiGuan |
| 162 | YangXi |
| 162 | YangChi |
| 162 | YangGu |
| 162 | LieQue |
| 162 | YuJi |
| 162 | LaoGong |
| 162 | HeGu |
| 163 | TianJing |
| 163 | ShaoHai |
| 163 | QuChi |
| 163 | ShouSanLi |
| 163 | WaiGuan |
| 163 | YangChi |
| 163 | YangXi |
| 163 | aShiXue |
| 164 | QuZe |
| 164 | DaLing |
| 164 | HeGu |
| 164 | PianLi |
| 164 | YuJi |
| 164 | YangXi |
| 164 | ZuSanLi |
| 164 | ShouSanLi |
| 164 | LaoGong |
| 164 | WaiLaoGong |
| 164 | NeiGuan |
| 164 | WaiGuan |
| 165 | DaLing |
| 166 | YangChi |
| 167 | TaiChong |
| 167 | ZhongFeng |
| 168 | NeiGuan |
| 168 | DaLing |
| 168 | HeGu |
| 168 | YangXi |
| 168 | LieQue |
| 169 | NeiGuan |
| 169 | DaLing |
| 169 | HeGu |
| 169 | YangXi |
| 169 | LieQue |
| 170 | DaLing |
| 170 | NeiGuan |
| 170 | YangXi |
| 171 | DaLing |
| 171 | NeiGuan |
| 172 | DaLing |
| 172 | NeiGuan |
| 172 | HeGu |
| 172 | BaXie |
| 172 | aShiXue |
| 173 | TaiChong |
| 173 | ZhongFeng |
| 174 | YangChi |
| 174 | YangXi |
| 174 | YangGu |
| 175 | DaLing |
| 175 | BaXie |
| 175 | NeiGuan |
| 176 | LaoGong |
| 176 | DaLing |
| 176 | NeiGuan |
| 176 | YuJi |
| 176 | HeGu |
| 176 | TaiChong |
| 176 | ZhongFeng |
| 177 | DaLing |
| 177 | BaXie |
| 177 | NeiGuan |
| 178 | NeiGuan |
| 178 | DaLing |
| 178 | YangXi |
| 178 | HeGu |
| 178 | LaoGong |
| 178 | YuJi |
| 179 | DaLing |
| 179 | QuZe |
| 179 | PianLi |
| 179 | HeGu |
| 179 | YangXi |
| 179 | YuJi |
| 179 | ShouSanLi |
| 179 | ZuSanLi |
| 179 | WaiLaoGong |
| 179 | LaoGong |
| 179 | WaiGuan |
| 179 | NeiGuan |
| 180 | NeiGuan |
| 180 | XiMen |
| 180 | JianShi |
| 181 | ShaoHai |
| 181 | QuZe |
| 181 | WanGu |
| 181 | YangXi |
| 181 | ShouSanLi |
| 181 | ChiZe |
| 182 | NeiGuan |
| 182 | DaLing |
| 182 | SanYinJiao |
| 182 | TongLi |
| 182 | HeGu |
| 182 | QuChi |
| 183 | DaLing |
| 183 | NeiGuan |
| 184 | DaLing |
| 184 | NeiGuan |
| 185 | DaLing |
| 185 | XiMen |
| 185 | NeiGuan |
| 185 | LaoGong |
| 185 | QingLing |
| 185 | ShenMen |
| 185 | ShaoFu |
| 185 | TaiYuan |
| 185 | QuChi |
| 186 | DaLing |
| 186 | NeiGuan |
| 186 | XiMen |
| 186 | ShenMen |
| 186 | TaiYuan |
| 186 | QuChi |
| 187 | DaLing |
| 187 | WaiGuan |
| 188 | DaLing |
| 188 | WaiGuan |
| 189 | DaLing |
| 189 | NeiGuan |
| 190 | DaLing |
| 190 | XiMen |
| 190 | NeiGuan |
| 190 | LaoGong |
| 190 | QingLing |
| 190 | ShenMen |
| 190 | ShaoFu |
| 190 | TaiYuan |
| 190 | QuChi |
| 191 | ShaoHai |
| 191 | QuZe |
| 191 | WanGu |
| 191 | YangXi |
| 191 | ShouSanLi |
| 191 | ChiZe |
| 192 | QuChi |
| 192 | WaiGuan |
| 192 | DaLing |
| 192 | YangChi |
| 192 | BaXie |
| 193 | NeiGuan |
| 193 | DaLing |
